# Supplementary material for: Hypomethylation of Alu Elements in Post-Menopausal Women with Osteoporosis
Source: PubMed Central journal article supplement (PMC3749148; doi:10.1371/journal.pone.0070386), 2013-08-21
Supplement: pone.0070386.s002.pdf [file pone.0070386.s002.pdf]

**Table S1** Mean and median of age, BMI, waist, SBP, DBP, %total body fat, BMD and Alu methylation pattern among normal, osteopenia, and osteoporosis diagnosed by DEXA T-score (>-1.0 SD=normal, -1.0 to -2.5 SD=osteopenia and <-2.5 SD=osteoporosis)

| <b>Characteristics</b>                      | <b>normal (76 cases)</b> | <b>osteopenia (156 cases)</b> | <b>osteoporosis (91 cases)</b> |
|---------------------------------------------|--------------------------|-------------------------------|--------------------------------|
| age (yrs)                                   | 52.80±0.73               | 57.07±0.49                    | 61.56±0.59                     |
| weight (kg)                                 | 61.71±1.70               | 56.94±0.72                    | 51.72±0.79                     |
| BMI (kg/m <sup>2</sup> )                    | 25.42±0.42               | 23.68±0.24                    | 21.76±0.28                     |
| waist (cm)                                  | 82.56±1.11               | 78.44±0.74                    | 75.94±0.75                     |
| SBP (mmHg)                                  | 127.2±1.78               | 124.83±1.11                   | 123.17±1.36                    |
| DBP ((mmHg)                                 | 78.45±1.27               | 76.55±0.78                    | 75.26±0.86                     |
| total body fat (%)                          | 37.57±1.14               | 37.30±0.52                    | 35.49±0.69                     |
| L1 BMD (g/cm <sup>2</sup> )                 | 1.11±0.02                | 0.97±0.01                     | 0.83±0.01                      |
| L2 BMD (g/cm <sup>2</sup> )                 | 1.20±0.02                | 1.00±0.01                     | 0.87±0.01                      |
| L3 BMD (g/cm <sup>2</sup> )                 | 1.30±0.02                | 1.08±0.01                     | 0.94±0.01                      |
| L4 BMD (g/cm <sup>2</sup> )                 | 1.30±0.03                | 1.08±0.01                     | 0.94±0.01                      |
| L12 BMD (g/cm <sup>2</sup> )                | 1.13±0.04                | 0.98±0.01                     | 0.86±0.01                      |
| L13 BMD (g/cm <sup>2</sup> )                | 1.19±0.03                | 1.02±0.01                     | 0.89±0.01                      |
| L14 BMD (g/cm <sup>2</sup> )                | 1.21±0.04                | 1.04±0.01                     | 0.91±0.01                      |
| L23 BMD (g/cm <sup>2</sup> )                | 1.25±0.03                | 1.04±0.01                     | 0.92±0.01                      |
| L24 BMD (g/cm <sup>2</sup> )                | 1.25±0.03                | 1.06±0.01                     | 0.93±0.01                      |
| L34 BMD (g/cm <sup>2</sup> )                | 1.27±0.04                | 1.08±0.01                     | 0.94±0.01                      |
| femur neck BMD (g/cm <sup>2</sup> )         | 1.00±0.02                | 0.82±0.01                     | 0.73±0.01                      |
| hip ward BMD (g/cm <sup>2</sup> )           | 0.91±0.03                | 0.68±0.01                     | 0.56±0.01                      |
| femur trochanteric BMD (g/cm <sup>2</sup> ) | 0.87±0.02                | 0.73±0.01                     | 0.62±0.01                      |
| hip total BMD (g/cm <sup>2</sup> )          | 1.09±0.02                | 0.91±0.01                     | 0.80±0.01                      |
| radius ud BMD (g/cm <sup>2</sup> )          | 0.38±0.01                | 0.32±0.00                     | 0.26±0.00                      |
| radius 33 BMD (g/cm <sup>2</sup> )          | 0.71±0.01                | 0.63±0.01                     | 0.55±0.01                      |
| radius total BMD (g/cm <sup>2</sup> )       | 0.56±0.01                | 0.48±0.00                     | 0.42±0.01                      |
| bone total BMD (g/cm <sup>2</sup> )         | 1.18±0.12                | 1.09±0.06                     | 1.00±0.01                      |
| %mC                                         | 30.60±0.55               | 30.57±0.44                    | 28.99±0.59                     |
| %mCmC                                       | 9.21±0.49                | 9.04±0.39                     | 7.27±0.45                      |
| %uCmC                                       | 24.69±0.49               | 24.83±0.36                    | 26.56±0.47                     |
| %mCuC                                       | 17.46±0.34               | 17.93±0.17                    | 17.87±0.29                     |
| %uCuC                                       | 47.38±0.81               | 47.10±0.60                    | 48.22±0.95                     |
