# Supplementary material for: Hypomethylation of Alu Elements in Post-Menopausal Women with Osteoporosis
Source: PubMed Central journal article supplement (PMC3749148; doi:10.1371/journal.pone.0070386), 2013-08-21
Supplement: pone.0070386.s003.pdf [file pone.0070386.s003.pdf]

**Table S2** Mean difference ( $X \pm SE$ ) of weight, BMI, waist, systolic blood pressure (SBP), diastolic blood pressure (DBP), and % total body fat between normal and osteopenia and between normal and osteoporosis as diagnosed by DEXA T-score ( $>-1.0$  SD=normal,  $-1.0$  to  $-2.5$  SD=osteopenia and  $<-2.5$  SD=osteoporosis) in the matched cases. Normal and osteopenia and normal and osteoporosis were paired by age

| Variables                | Subjects    |             |                      |             |              |                      |
|--------------------------|-------------|-------------|----------------------|-------------|--------------|----------------------|
|                          | normal      | osteopenia  | p-value <sup>a</sup> | normal      | osteoporosis | p-value <sup>b</sup> |
| weight (kg)              | 62.06±1.34  | 56.85±0.94  | 0.002                | 62.67±1.92  | 51.43±1.29   | 0.000                |
| BMI (kg/m <sup>2</sup> ) | 25.74±0.52  | 23.74±0.42  | 0.003                | 25.95±0.69  | 21.69±0.49   | 0.000                |
| waist (cm)               | 83.14±1.61  | 78.62±1.07  | 0.006                | 83.14±1.61  | 75.06±1.30   | 0.000                |
| SBP (mmHg)               | 128.47±1.84 | 123.48±1.31 | 0.03                 | 129.36±2.93 | 120.85±1.66  | 0.02                 |
| DBP(mmHg)                | 79.42±1.28  | 76.12±1.17  | NS                   | 78.73±1.88  | 75.52±1.26   | NS                   |
| %total body fat          | 38.85±1.36  | 36.69±0.79  | NS                   | 40.02±1.85  | 35.42±1.25   | 0.04                 |

<sup>a</sup>Significant differences by T-test between normal and osteopenia at  $P\text{-value} \leq 0.05$

<sup>b</sup>Significant differences by T-test between normal and osteoporosis at  $P\text{-value} \leq 0.05$
