# Supplementary material for: Hypomethylation of Alu Elements in Post-Menopausal Women with Osteoporosis
Source: PubMed Central journal article supplement (PMC3749148; doi:10.1371/journal.pone.0070386), 2013-08-21
Supplement: pone.0070386.s004.pdf [file pone.0070386.s004.pdf]

**Table S3** Mean difference ( $X \pm SE$ ) of bone mass density (BMD) at each region: L1, L2, L3, L4, L1-2, L1-3, L1-4, L2-3, L2-4, L3-4, femur neck, hip ward, femur trochanteric, hip total, radius ud, radius 33, radius total, and bone total between matched cases with body mass index (BMI) $<25 \text{ kg/m}^2$  and BMI $\geq 25 \text{ kg/m}^2$ . Paired age between cases with body mass index (BMI) $<25 \text{ kg/m}^2$  and cases with BMI $\geq 25 \text{ kg/m}^2$

| BMD ( $\text{g/cm}^2$ ) | BMI ( $\text{kg/m}^2$ ) |                            | P-value <sup>a</sup> |
|-------------------------|-------------------------|----------------------------|----------------------|
|                         | $<25 \text{ (kg/m}^2)$  | $\geq 25 \text{ (kg/m}^2)$ |                      |
| L1 BMD                  | 0.89 $\pm$ 0.02         | 0.98 $\pm$ 0.02            | 0.000                |
| L2 BMD                  | 0.94 $\pm$ 0.02         | 1.04 $\pm$ 0.02            | 0.000                |
| L3 BMD                  | 1.03 $\pm$ 0.02         | 1.12 $\pm$ 0.02            | 0.004                |
| L4 BMD                  | 1.03 $\pm$ 0.02         | 1.14 $\pm$ 0.02            | 0.001                |
| L1-2 BMD                | 0.94 $\pm$ 0.02         | 1.04 $\pm$ 0.02            | 0.001                |
| L1-3 BMD                | 0.98 $\pm$ 0.02         | 1.08 $\pm$ 0.02            | 0.001                |
| L1-4 BMD                | 1.00 $\pm$ 0.02         | 1.11 $\pm$ 0.02            | 0.001                |
| L2-3 BMD                | 1.01 $\pm$ 0.02         | 1.12 $\pm$ 0.03            | 0.001                |
| L2-4 BMD                | 1.02 $\pm$ 0.02         | 1.13 $\pm$ 0.02            | 0.001                |
| L3-4 BMD                | 1.04 $\pm$ 0.03         | 1.16 $\pm$ 0.02            | 0.001                |
| femur neck BMD          | 0.77 $\pm$ 0.01         | 0.85 $\pm$ 0.01            | 0.001                |
| hip ward BMD            | 0.63 $\pm$ 0.02         | 0.70 $\pm$ 0.02            | 0.009                |
| femur trochanteric BMD  | 0.67 $\pm$ 0.02         | 0.75 $\pm$ 0.01            | 0.000                |
| hip total BMD           | 0.86 $\pm$ 0.01         | 0.96 $\pm$ 0.02            | 0.000                |
| radius ud BMD           | 0.31 $\pm$ 0.01         | 0.35 $\pm$ 0.01            | 0.000                |
| radius 33 BMDI          | 0.61 $\pm$ 0.01         | 0.64 $\pm$ 0.01            | 0.034                |
| radius total BMD        | 0.48 $\pm$ 0.01         | 0.52 $\pm$ 0.01            | 0.001                |
| bone total BMD          | 1.07 $\pm$ 0.01         | 1.11 $\pm$ 0.01            | 0.020                |

<sup>a</sup>Significant differences by T-test between BMI $<25 \text{ kg/m}^2$  and BMI $\geq 25 \text{ kg/m}^2$  at P-value $\leq 0.05$
