# Supplementary material for: Hypomethylation of Alu Elements in Post-Menopausal Women with Osteoporosis
Source: PubMed Central journal article supplement (PMC3749148; doi:10.1371/journal.pone.0070386), 2013-08-21
Supplement: pone.0070386.s005.pdf [file pone.0070386.s005.pdf]

**Table S4** The percentages of Alu methylation levels in each position of CpG and mean of all CpG in normal, osteopenia, and osteoporosis cases.

| cases               | CpG Alu methylation |                |                |                |              |
|---------------------|---------------------|----------------|----------------|----------------|--------------|
|                     | CpG position 1      | CpG position 2 | CpG position 3 | CpG position 4 | all CpG mean |
| <b>normal</b>       | 38.01±0.48          | 29.37±0.23     | 20.41±0.30     | 38.57±0.44     | 31.59±0.25   |
| <b>osteopenia</b>   | 36.80±0.27          | 28.59±0.30     | 20.22±0.21     | 38.15±0.48     | 31.01±0.27   |
| <b>osteoporosis</b> | 35.71±0.37          | 28.29±0.28     | 20.15±0.30     | 38.55±0.64     | 30.67±0.29   |
